# Supplementary material
Source: PubMed Central journal article supplement (PMC3175293)

**Fig. S1**

**A**

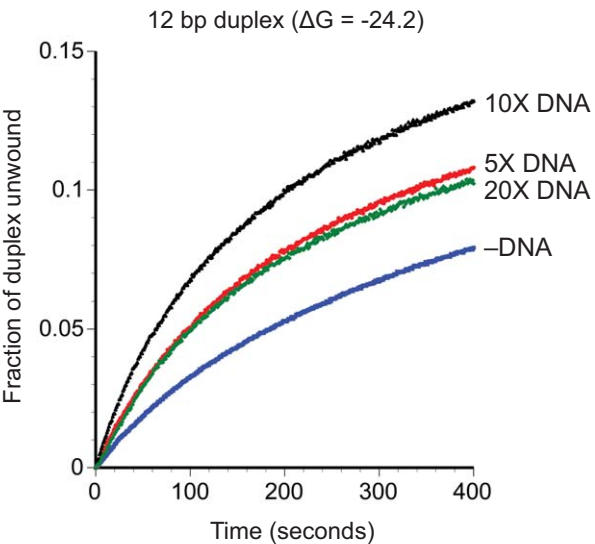

**B**

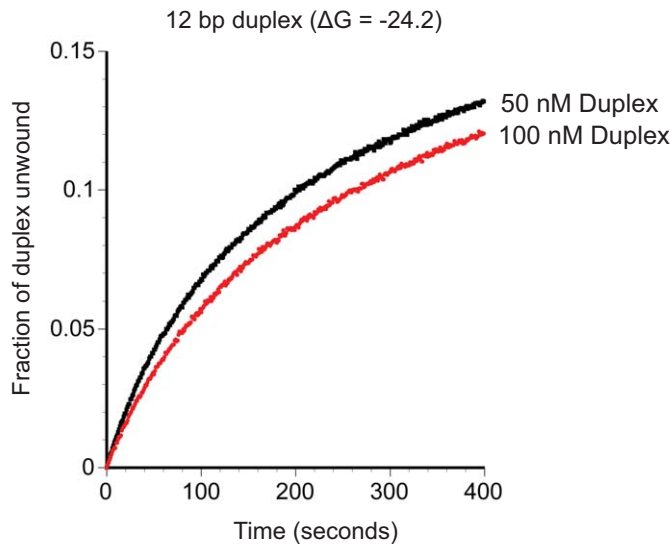

Supplement: NIHMS317542-supplement-02.pdf [file NIHMS317542-supplement-02.pdf]

# Fig. S2

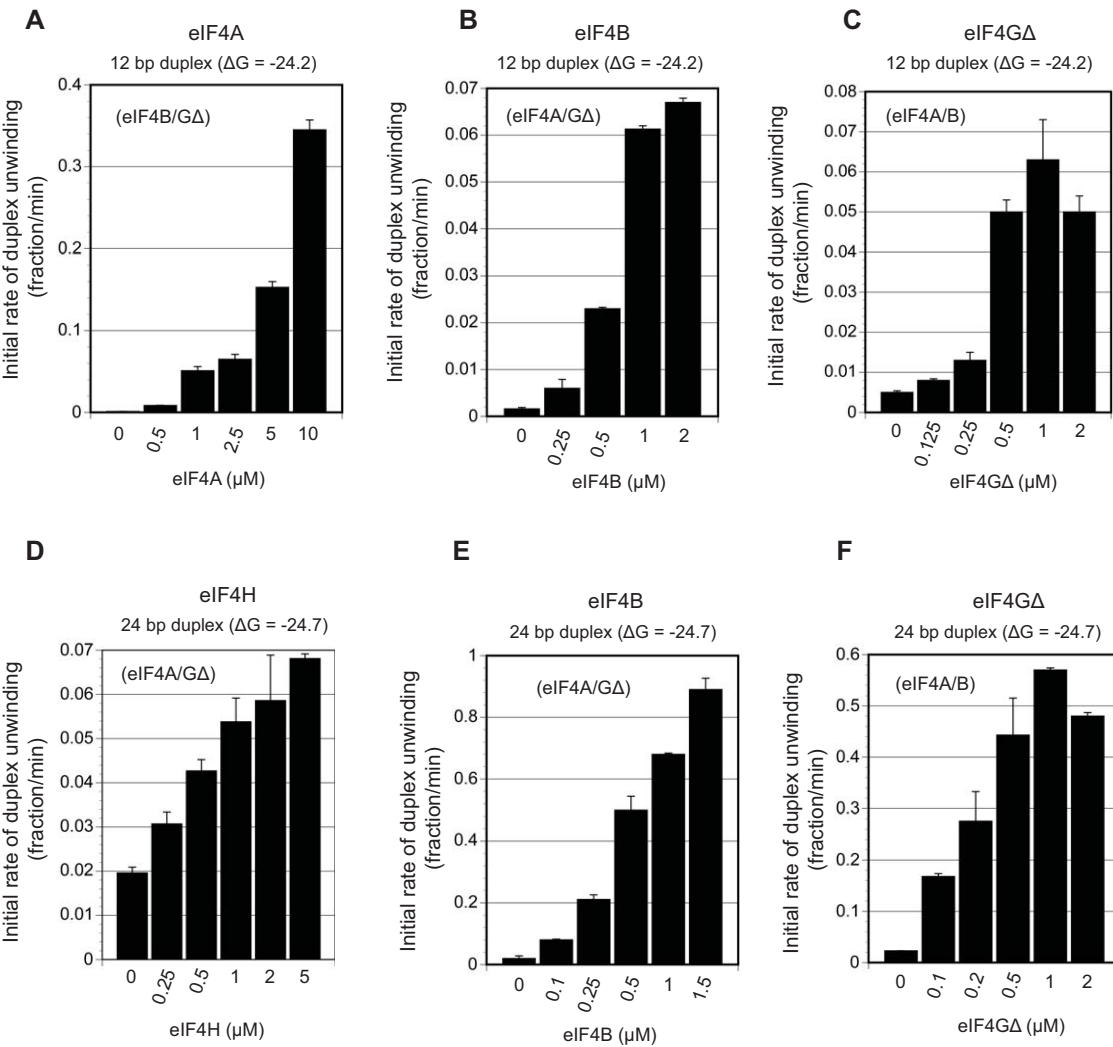

Supplement: NIHMS317542-supplement-03.pdf [file NIHMS317542-supplement-03.pdf]

**Fig. S3**

**A**

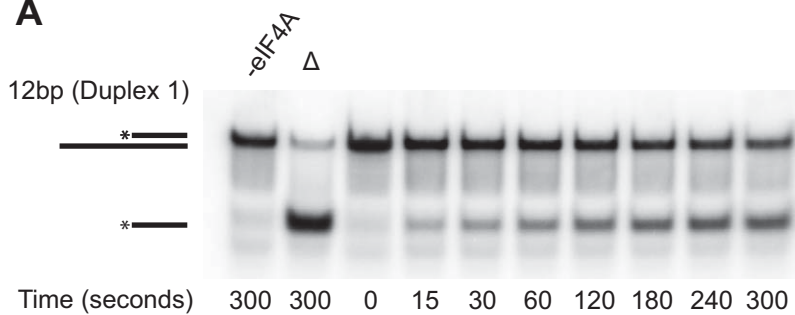

**B**

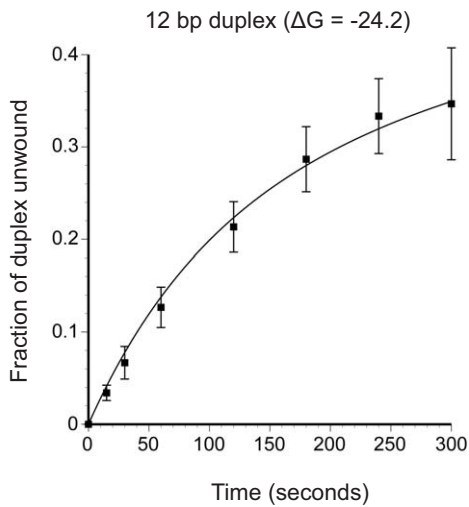

Supplement: NIHMS317542-supplement-04.pdf [file NIHMS317542-supplement-04.pdf]

**Fig. S4**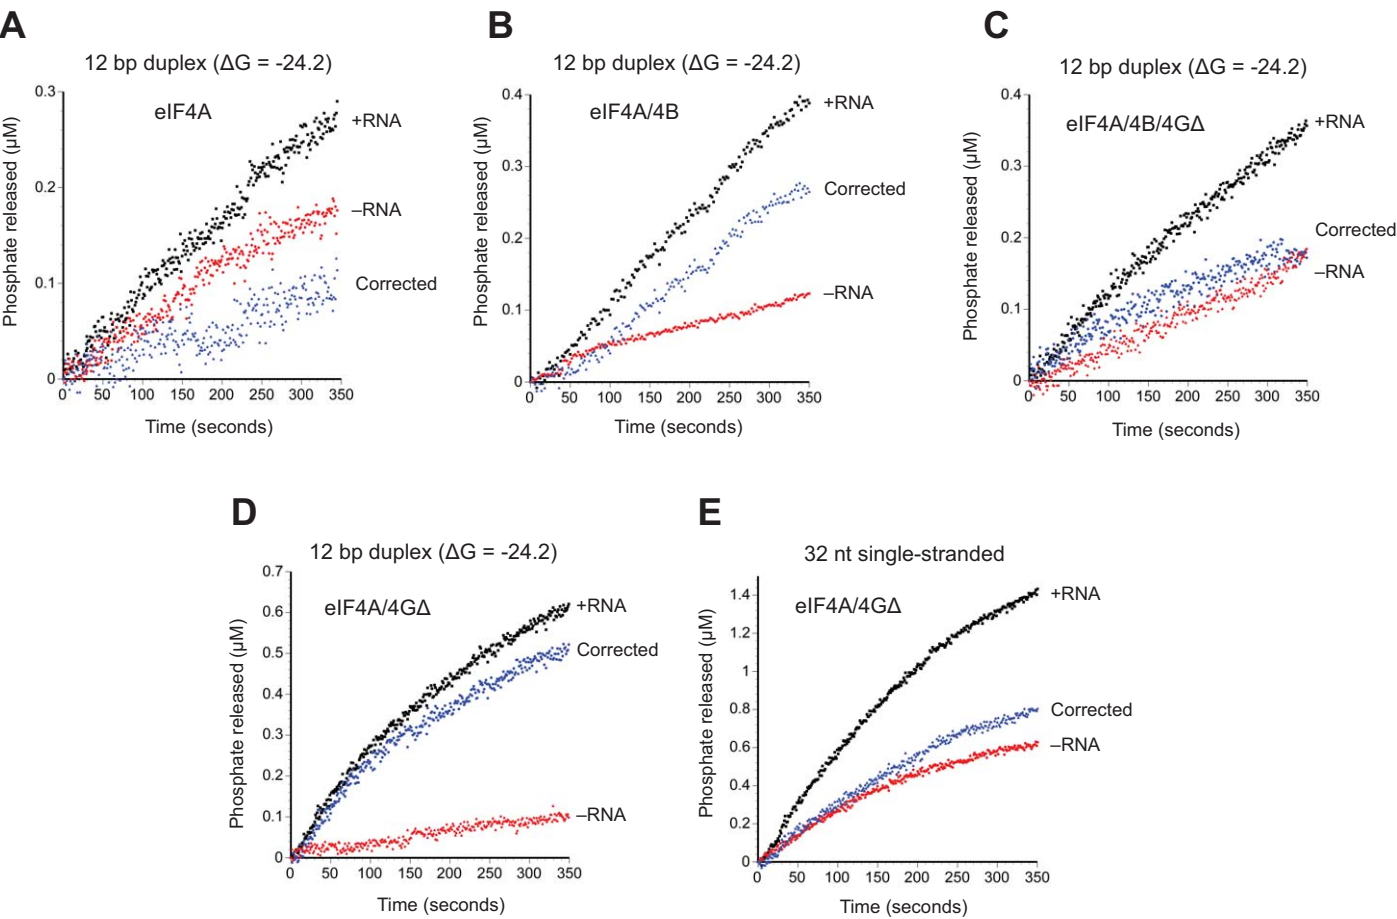

Supplement: NIHMS317542-supplement-05.pdf [file NIHMS317542-supplement-05.pdf]
